# Supplementary material for: Modelling Spatiotemporal Patterns of Lyme Disease Emergence in Québec
Source: MDPI journal article supplement (doi:10.3390/ijerph18189669), 2021-09-14
Supplement: s1 [file s1]

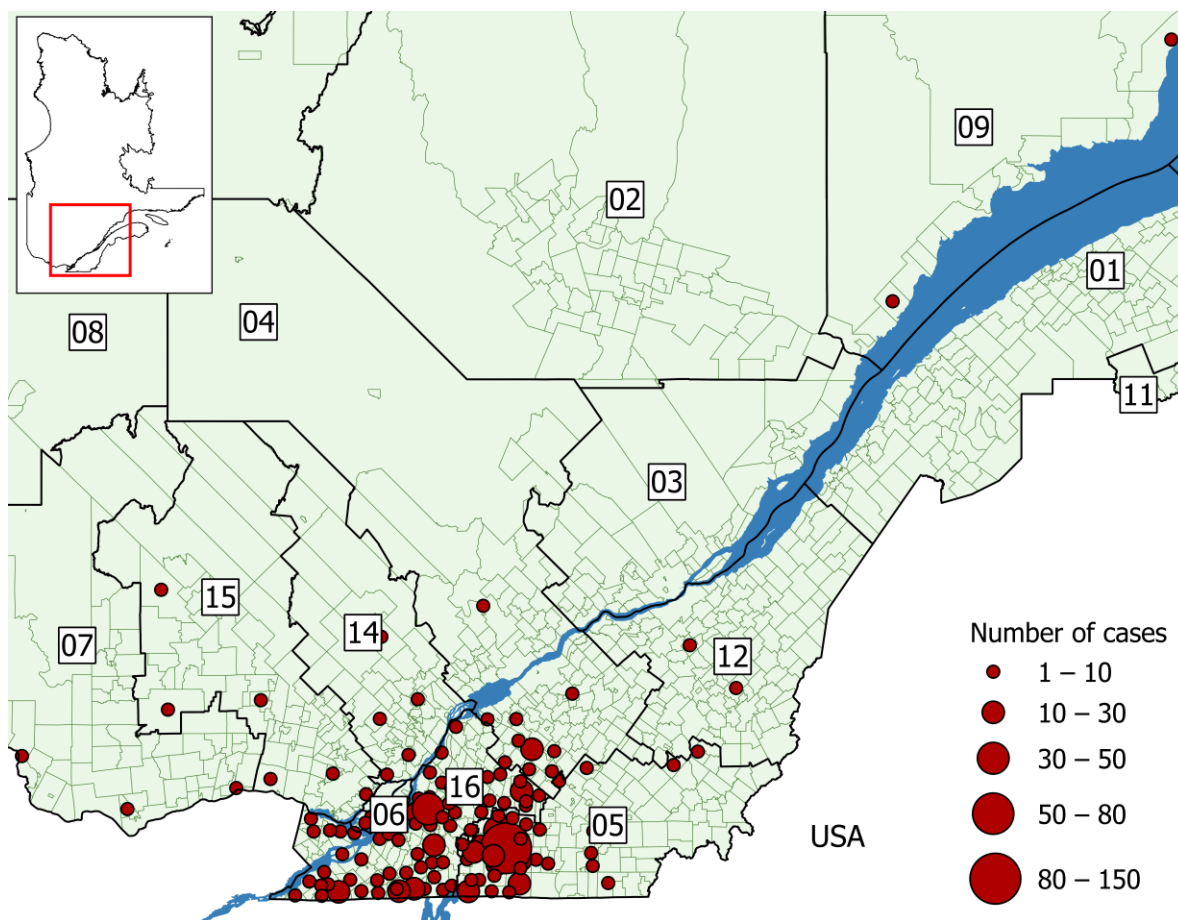

**Figure S1.** Cumulative number of Lyme disease cases in Québec acquired locally, 2006–2018 by date of symptom onset ( $n = 693$ ). Sociosanitary regions: 01) Bas-Saint-Laurent; 02) Saguenay – Lac-Saint-Jean; 03) Capitale-Nationale; 04) Mauricie et Centre-du-Québec; 05) Estrie; 06) Montréal; 07) Outaouais; 08) Abitibi-Témiscamingue; 09) Côte-Nord; 11) Gaspésie – Îles-de-la-Madeleine; 12) Chaudière-Appalaches; 14) Lanaudière; 15) Laurentides; 16) Montérégie.

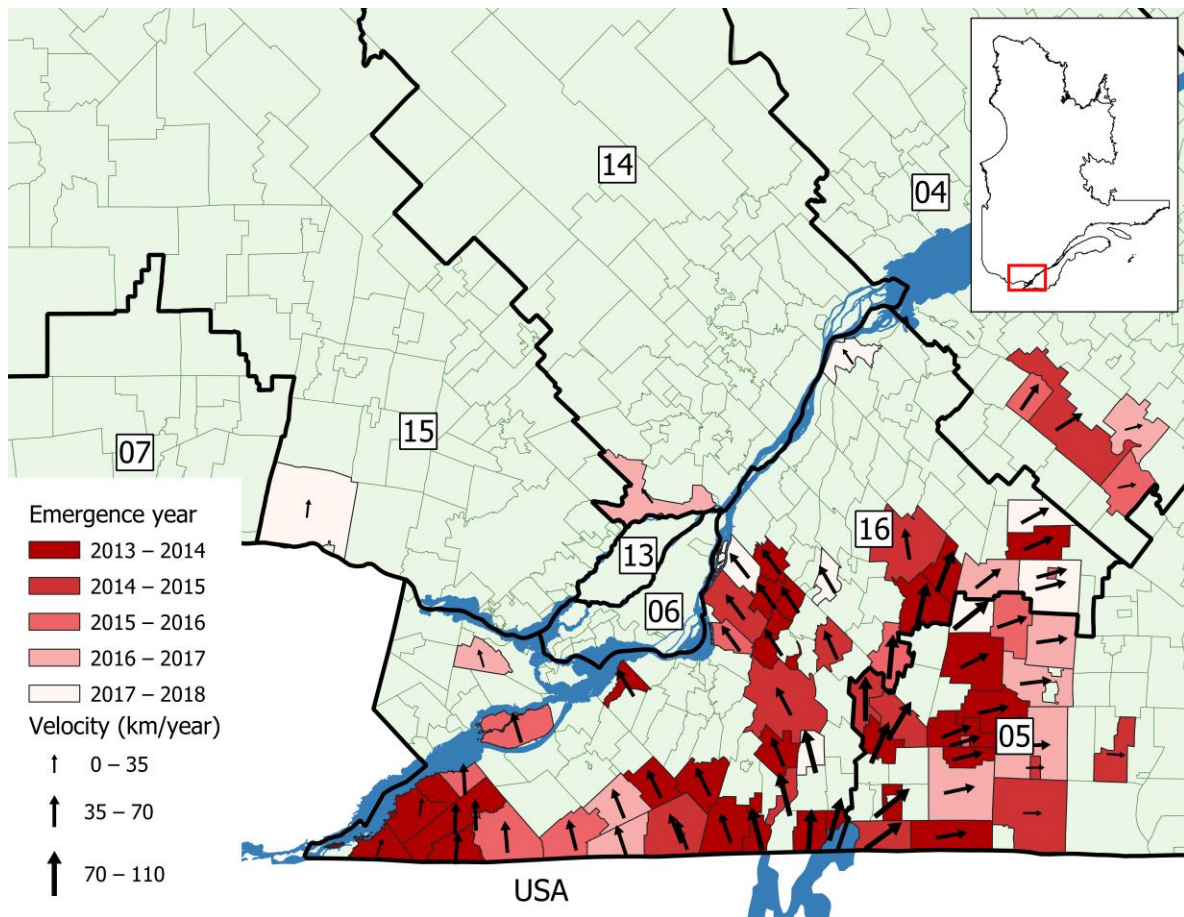

**Figure S2.** Lyme disease emergence velocity in Québec in municipalities having declared at least two cases in the last five years ( $n = 70$ ) by date of symptom onset (2013–2018). Sociosanitary regions: 04) Mauricie et Centre-du-Québec; 05) Estrie; 06) Montréal; 07) Outaouais; 13) Laval; 14) Lanaudière; 15) Laurentides; 16) Montérégie.

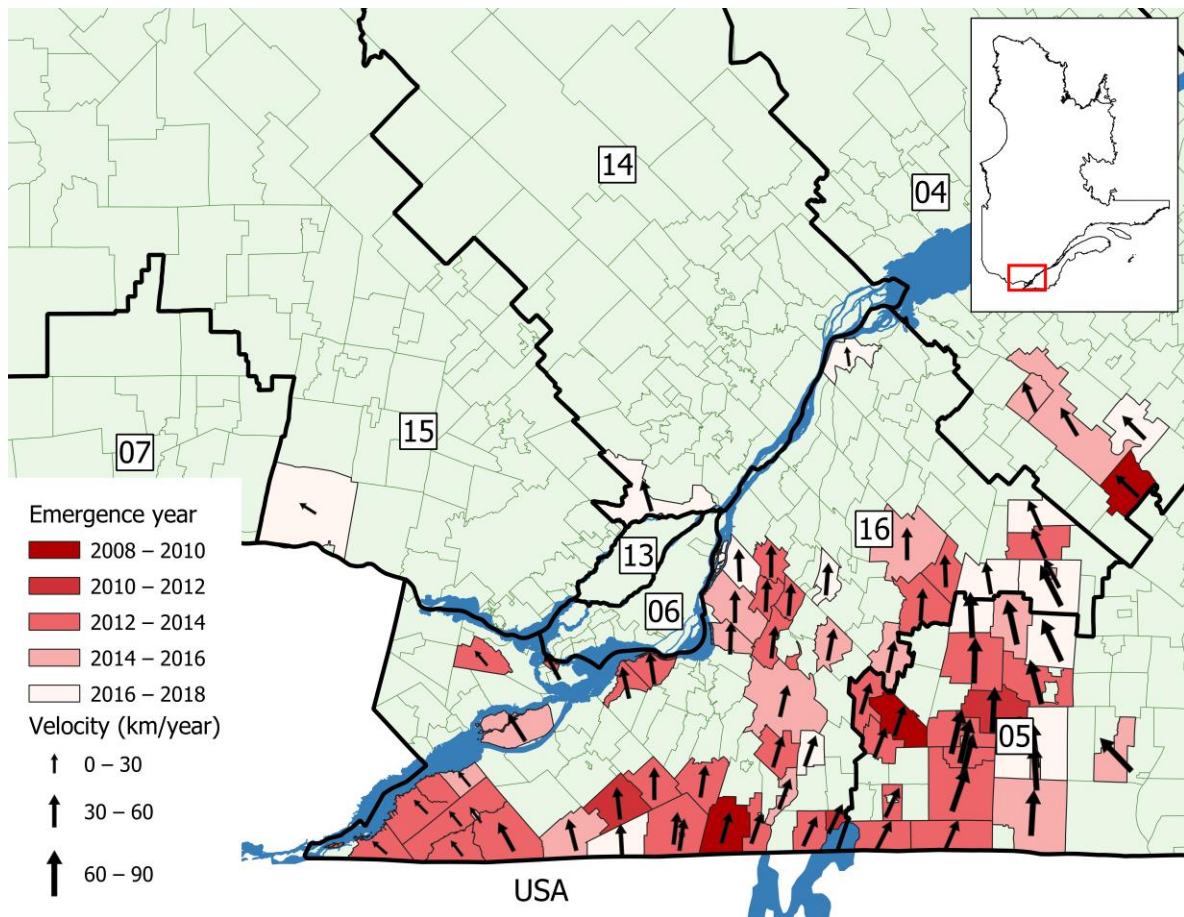

**Figure S3.** Lyme disease emergence velocity in Québec in municipalities having declared at least two cases ( $n = 72$ ) by date of symptom onset (2006–2018). Sociosanitary regions: 04) Mauricie et Centre-du-Québec; 05) Estrie; 06) Montréal; 07) Outaouais; 13) Laval; 14) Lanaudière; 15) Laurentides; 16) Montérégie.

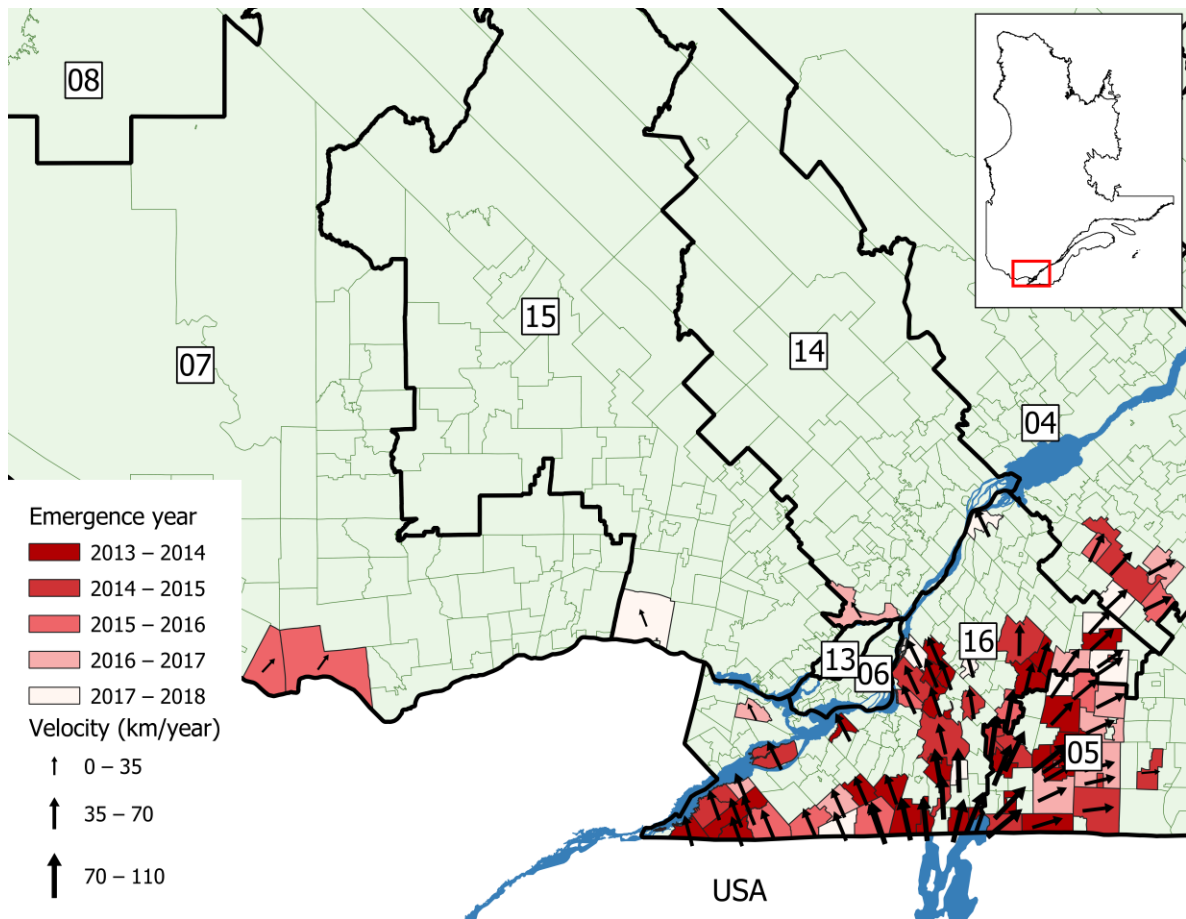

**Figure S4.** Lyme disease emergence velocity in Québec in municipalities having declared at least two cases in the last five years ( $n = 73$ ) by date of notification (2013–2018). Sociosanitary regions: 04) Mauricie et Centre-du-Québec; 05) Estrie; 06) Montréal; 07) Outaouais; 08) Abitibi-Témiscamingue; 13) Laval; 14) Lanaudière; 15) Laurentides; 16) Montérégie.



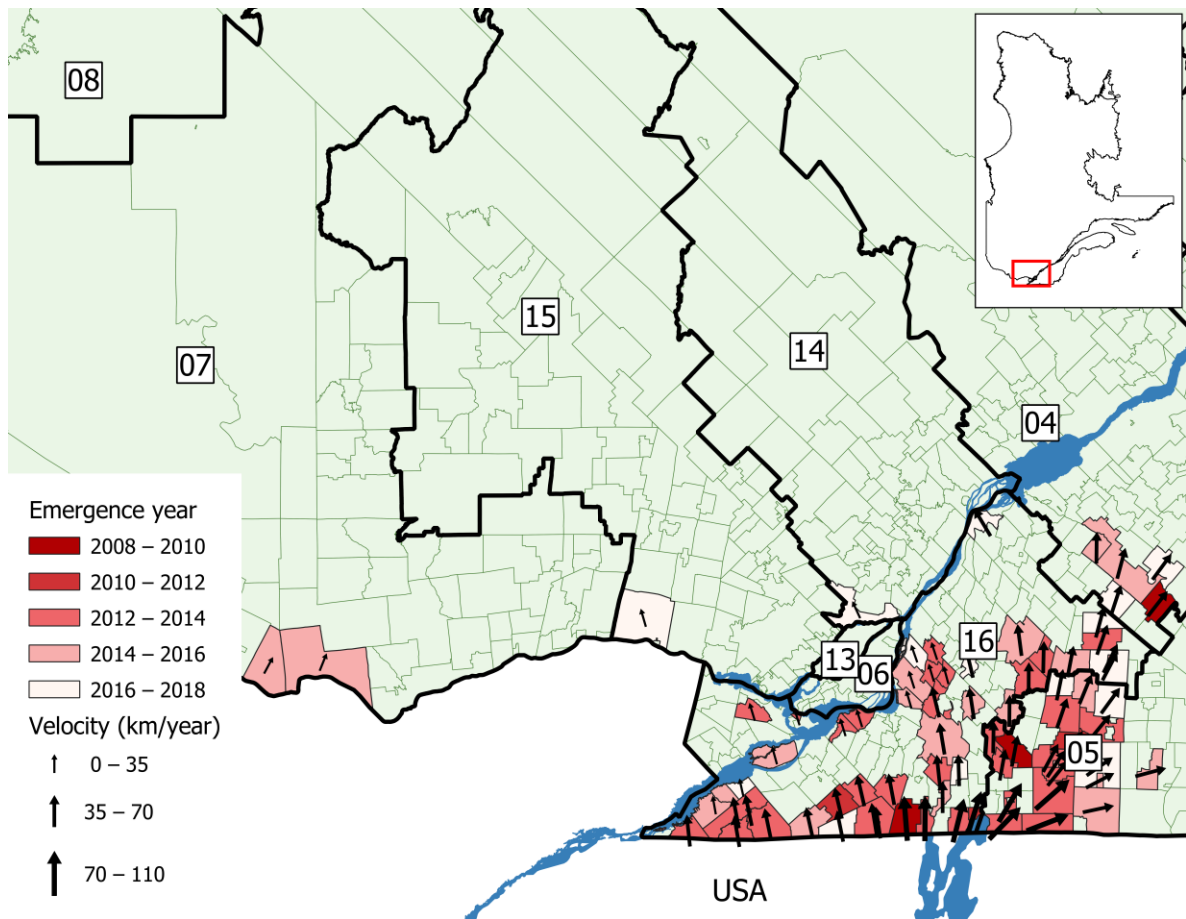

**Figure S5.** Lyme disease emergence velocity in Québec in municipalities having declared at least two cases over the whole study period ( $n = 75$ ) by date of notification (2006–2018). Sociosanitary regions: 04) Mauricie et Centre-du-Québec; 05) Estrie; 06) Montréal; 07) Outaouais; 08) Abitibi-Témiscamingue; 13) Laval; 14) Lanaudière; 15) Laurentides; 16) Montérégie.

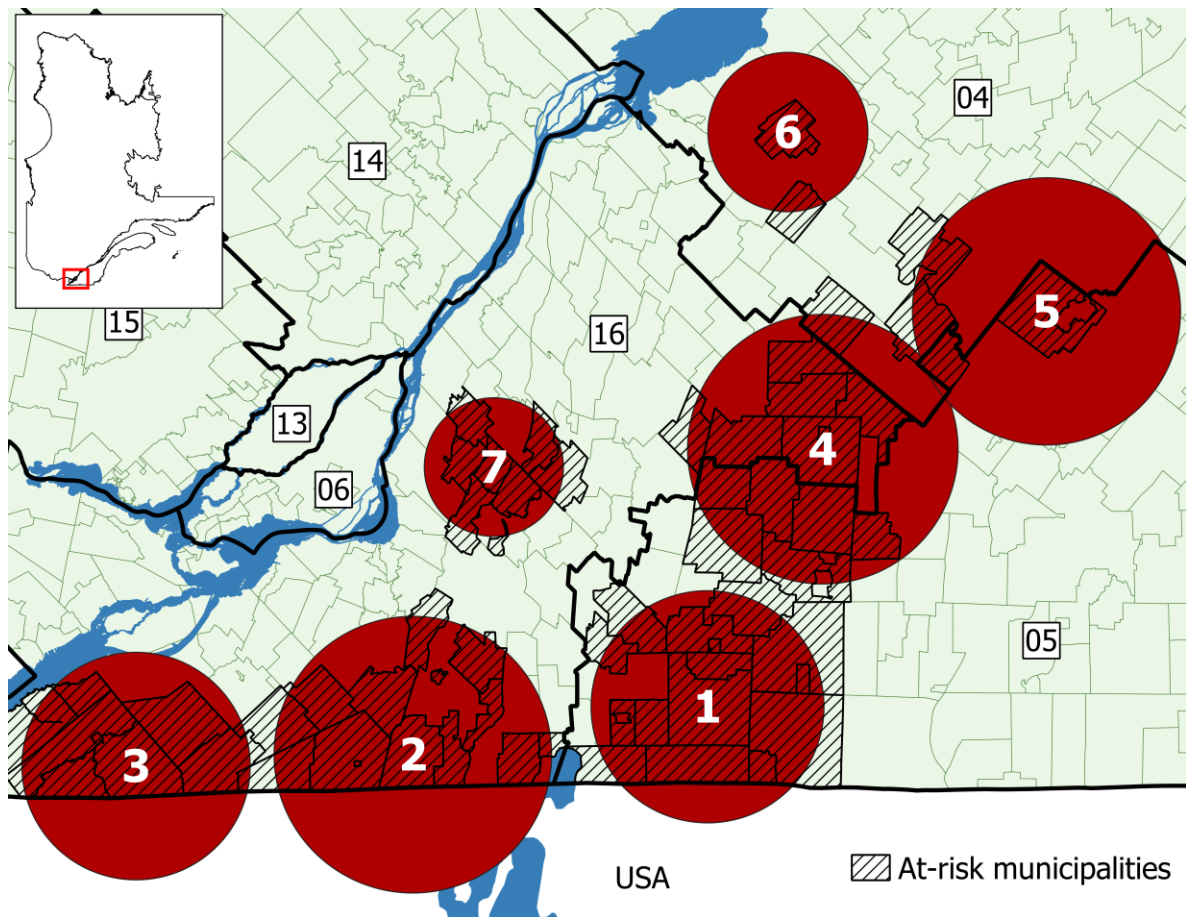

**Figure S6.** Spatiotemporal clusters of Lyme disease cases in Québec between 2006 and 2018 by date of symptom onset ( $n = 524$  cases). Clusters are shown in order of appearance. If clusters appeared in the same time period, they were numbered by decreasing count of at-risk municipalities. Each circle represents a cluster no larger than 50 km in diameter, capturing no more than 15% of the population at-risk (underlying population). Socio-sanitary regions: 04) Mauricie et Centre-du-Québec; 05) Estrie; 06) Montréal; 13) Laval; 14) Lanaudière; 15) Laurentides; 16) Montérégie.

**Table S1.** Spatiotemporal cluster variables of Lyme disease cases in Québec between 2006 and 2018 by date of symptom onset ( $n = 524$  cases).

|                        | Clusters  |           |           |           |           |           |           |
|------------------------|-----------|-----------|-----------|-----------|-----------|-----------|-----------|
|                        | 1         | 2         | 3         | 4         | 5         | 6         | 7         |
| Radius (km)            | 20.80     | 24.81     | 20.41     | 23.97     | 23.67     | 14.05     | 12.33     |
| Time period            | 2013-2018 | 2013-2018 | 2013-2018 | 2015-2018 | 2015-2018 | 2015-2018 | 2016-2018 |
| Municipalities at-risk | 15        | 14        | 8         | 14        | 4         | 2         | 7         |
| Population at-risk     | 52 676    | 26 424    | 15 644    | 100 670   | 7 239     | 2 074     | 109 440   |
| Declared cases         | 269       | 73        | 40        | 85        | 6         | 5         | 46        |
| Expected cases         | 4.89      | 2.45      | 1.45      | 6.23      | 0.45      | 0.13      | 5.08      |
| Annual cases/100 000   | 85.1      | 46.0      | 42.6      | 21.1      | 20.7      | 60.3      | 14.0      |
| Relative risk          | 89.27     | 33.13     | 29.17     | 15.41     | 13.50     | 49.22     | 9.62      |
| <i>p</i> -value        | <0.001    | <0.001    | <0.01     | <0.001    | 0.032     | 0.0016    | <0.01     |

RR represents the relative risk of LD within the clusters relative to the risk outside the clusters.

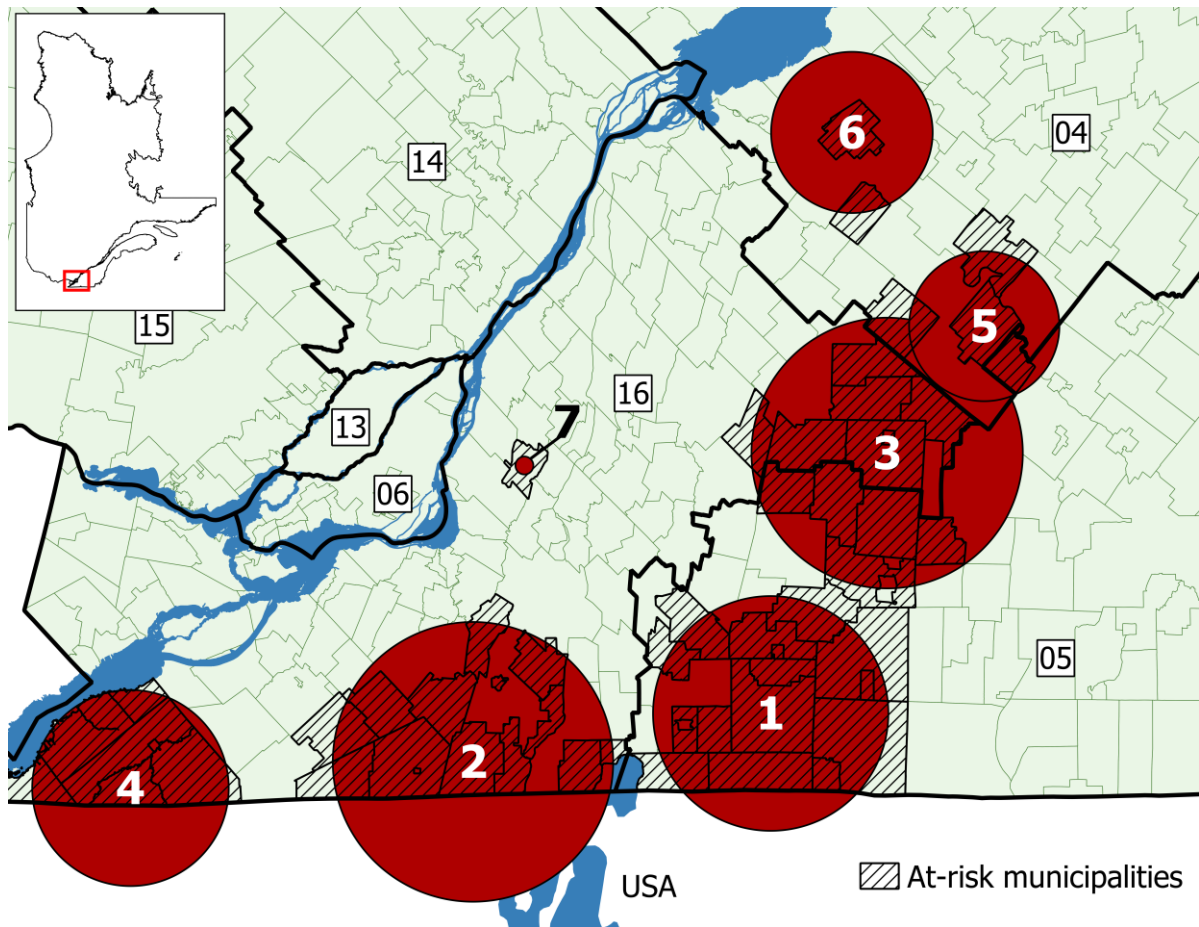

**Figure S7.** Spatial clusters of Lyme disease cases in Québec between 2006 and 2018 by date of symptom onset ( $n = 490$  cases). Clusters are shown in order of number of municipalities at risk. Each circle represents a cluster no larger than 50 km in diameter, capturing no more than 15% of the population at-risk (underlying population). Socio-sanitary regions: 04) Mauricie et Centre-du-Québec; 05) Estrie; 06) Montréal; 13) Laval; 14) Lanaudière; 15) Laurentides; 16) Montérégie.



**Table S2.** Spatial cluster variables of Lyme disease cases in Québec between 2006 and 2018 by date of symptom onset ( $n = 490$  cases).

|                        | Clusters |        |        |        |       |        |        |
|------------------------|----------|--------|--------|--------|-------|--------|--------|
|                        | 1        | 2      | 3      | 4      | 5     | 6      | 7      |
| Radius (km)            | 20.80    | 24.81  | 23.80  | 17.40  | 13.14 | 14.05  | 0.00   |
| Municipalities at-risk | 15       | 14     | 13     | 7      | 3     | 2      | 1      |
| Population at-risk     | 52 676   | 26 434 | 34 222 | 10 738 | 3 420 | 2 074  | 26 453 |
| Declared cases         | 277      | 79     | 60     | 37     | 6     | 5      | 31     |
| Expected cases         | 10.60    | 5.32   | 6.89   | 2.16   | 0.69  | 0.42   | 5.32   |
| Annual cases/100 000   | 40.5     | 23.0   | 13.5   | 26.5   | 13.5  | 18.5   | 9.0    |
| Relative risk          | 42.88    | 16.64  | 9.45   | 18.4   | 8.79  | 12.06  | 6.05   |
| <i>p</i> value         | <0.001   | <0.001 | <0.001 | <0.001 | 0.011 | 0.0095 | <0.001 |

RR represents the relative risk of LD within the clusters relative to the risk outside the clusters.

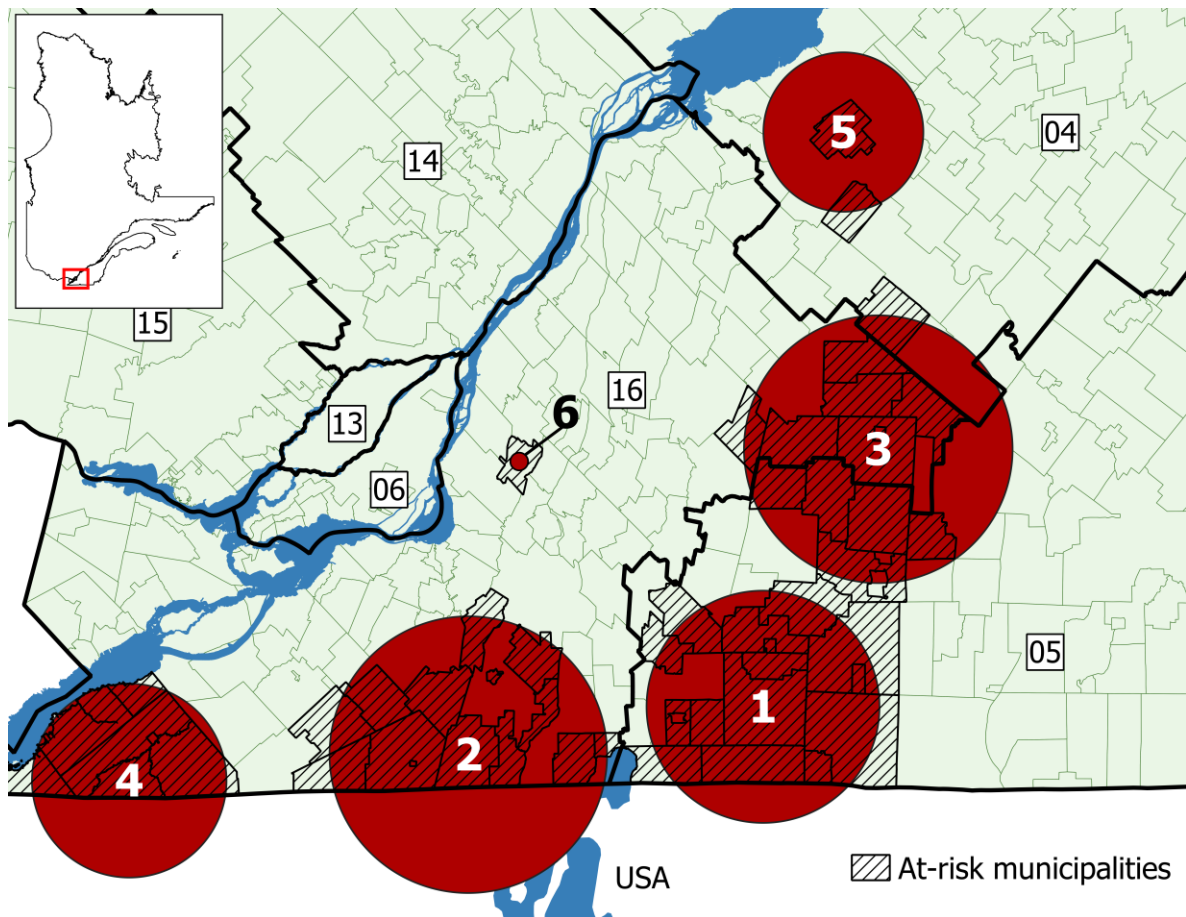

**Figure S8.** Spatial clusters of Lyme disease cases in Québec between 2006 and 2018 by date of notification ( $n = 506$ ). Clusters are shown in order of number of municipalities at risk. Each circle represents a cluster no larger than 50 km in diameter, capturing no more than 15% of the population at-risk (underlying population). Socio-sanitary regions: 04) Mauricie et Centre-du-Québec; 05) Estrie; 06) Montréal; 13) Laval; 14) Lanaudière; 15) Laurentides; 16) Montréal.

**Table S3.** Spatial cluster variables of Lyme disease cases in Québec between 2006 and 2018 by date of notification ( $n = 506$  cases).

|                        | Clusters |        |        |        |       |        |
|------------------------|----------|--------|--------|--------|-------|--------|
|                        | 1        | 2      | 3      | 4      | 5     | 6      |
| Radius (km)            | 20.80    | 24.81  | 23.80  | 17.40  | 14.05 | 0.00   |
| Municipalities at-risk | 15       | 14     | 13     | 7      | 2     | 1      |
| Population at-risk     | 52 675   | 26 423 | 34 222 | 10 739 | 2 074 | 26 453 |
| Declared cases         | 290      | 81     | 62     | 37     | 5     | 31     |
| Expected cases         | 10.14    | 5.09   | 6.59   | 2.07   | 0.40  | 5.09   |
| Annual cases/100 000   | 42.4     | 23.6   | 13.9   | 26.5   | 18.5  | 9.0    |
| Relative risk          | 46.90    | 17.79  | 10.19  | 18.80  | 12.60 | 6.31   |
| <i>p</i> value         | <0.001   | <0.001 | <0.001 | <0.001 | 0.011 | <0.001 |

RR represents the relative risk of LD within the clusters relative to the risk outside the clusters.
